# Supplementary material for: Synthesis of polypeptide conjugated with near infrared fluorescence probe and doxorubicin for pH-responsive and image-guided drug delivery
Source: Royal Society of Chemistry journal article supplement (doi:10.1039/c2jm35627a), 2012-01-01
Supplement: c2jm35627a.pdf [file c2jm35627a.pdf]

Supporting Materials for:

### Synthesis of Polypeptide Conjugated with Near Infrared Fluorescence Probe and Doxorubicin For pH-responsive and Image-guided Drug Delivery

Tao Xing, Xianzhu Yang, Feng Wang, Bin Lai, Lifeng Yan \*

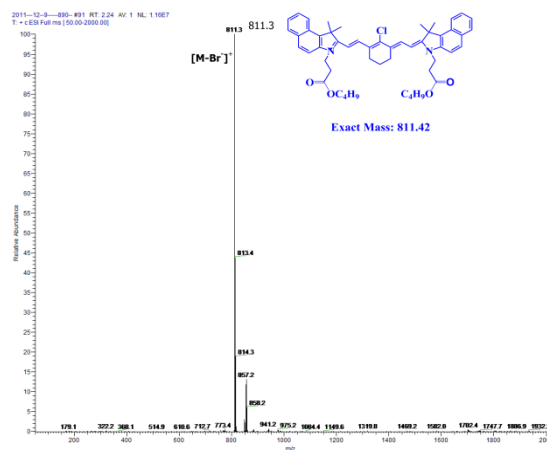

Fig. S1 Mass spectrum (ESI) of cyanine dye 4.

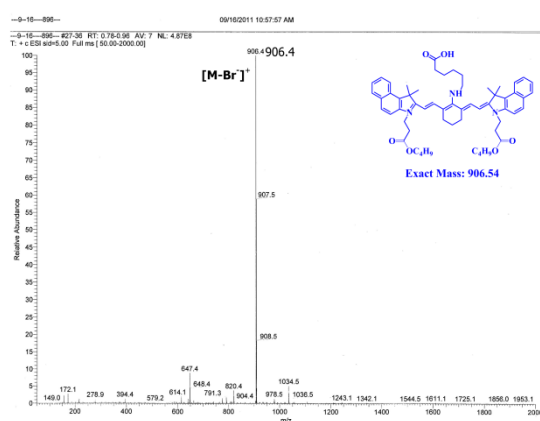

Fig. S2 Mass spectrum (ESI) of aminocyanine 5.

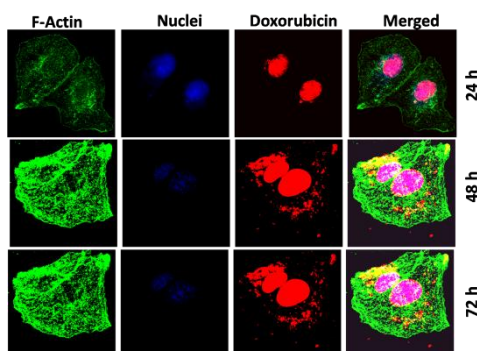

Fig. S3 *In vitro* cellular uptake study of free doxorubicin at 24, 48, 72 h. Nuclei: stain blue with DAPI; Green: F-actin; Red: doxorubicin.
